# Supplementary material for: Zero-Inflated gaussian mixed models for analyzing longitudinal microbiome data
Source: PubMed Central journal article supplement (PMC7652264; doi:10.1371/journal.pone.0242073), 2020-11-09
Supplement: pone.0242073.s001.pdf [file pone.0242073.s001.pdf]

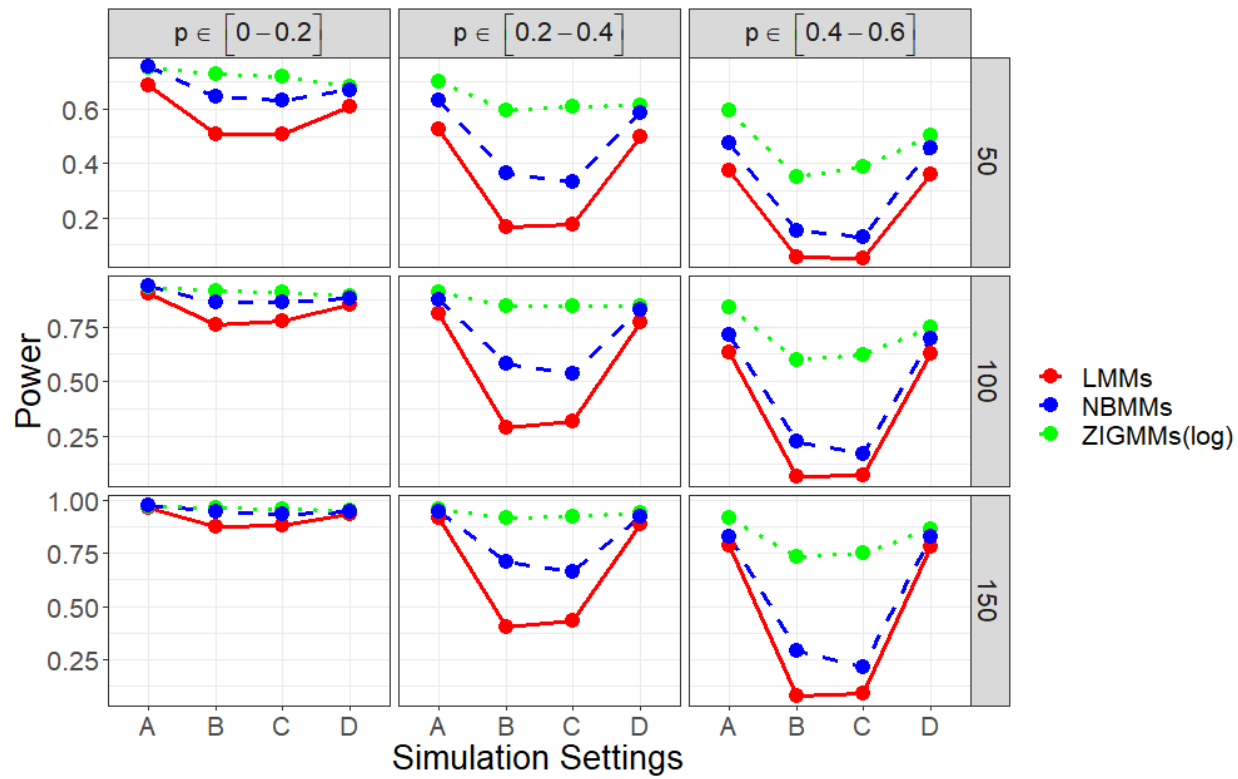

**Fig A.1** Empirical power of hypothesis in four simulation settings under high effect scenario
