# Supplementary material for: Zero-Inflated gaussian mixed models for analyzing longitudinal microbiome data
Source: PubMed Central journal article supplement (PMC7652264; doi:10.1371/journal.pone.0242073), 2020-11-09
Supplement: pone.0242073.s002.pdf [file pone.0242073.s002.pdf]

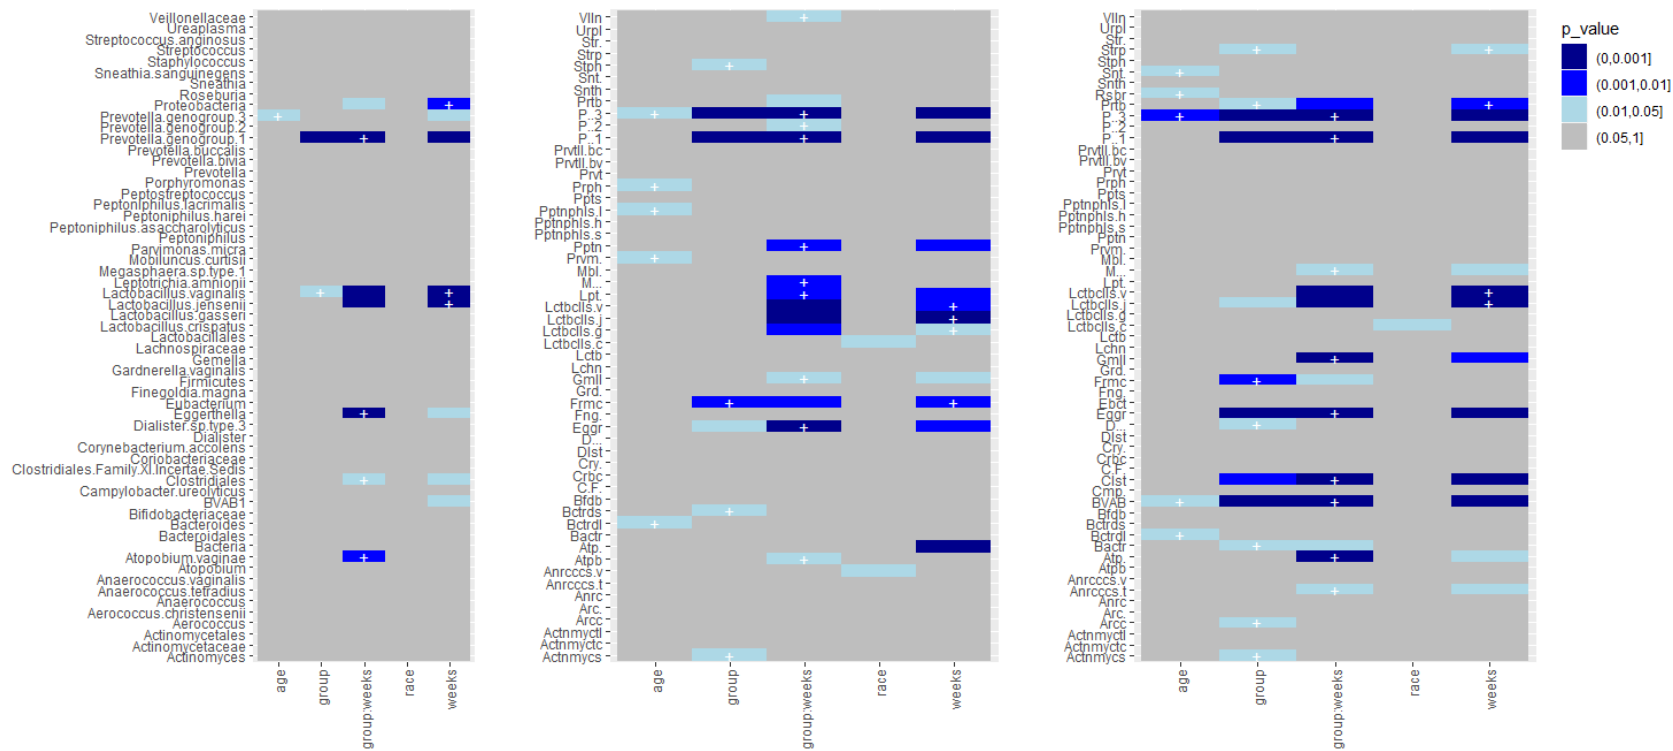

**Fig A.2** Heat map for p-values between the taxa and each variable from Model C using LMMs (left panel), NBMMs (middle panel) and ZIGMMs (right panel). The sign “+” indicates the positive effect.
